# Supplementary material for: Controlling elastico-mechanoluminescence in diphase (Ba,Ca)TiO3:Pr3+ by co-doping different rare earth ions
Source: Royal Society of Chemistry journal article supplement (doi:10.1039/c4ra05894a), 2014-01-01
Supplement: c4ra05894a1.pdf [file c4ra05894a1.pdf]

## Electronic Supplementary Information (ESI)

### Controlling elastically-mechanoluminescence in diphasic (Ba,Ca)TiO<sub>3</sub>:Pr<sup>3+</sup> by co-doping different rare earth ions

Jun-Cheng Zhang,<sup>a,e,f,\*</sup> Yun-Ze Long,<sup>a,e</sup> Xusheng Wang,<sup>b</sup> and Chao-Nan Xu<sup>c,d,\*</sup>

<sup>a</sup>College of Physics, Qingdao University, Qingdao 266071, P. R. China

<sup>b</sup>Functional Materials Research Laboratory, Tongji University, Shanghai 200092, P. R. China

<sup>c</sup>National Institute of Advanced Industrial Science and Technology, Kyushu, Shuku 807-1, Tosu, Saga 841-0052, Japan

<sup>d</sup>International Institute for Carbon Neutral Energy Research (WPI-I2CNER), Kyushu University, Fukuoka, Japan

<sup>e</sup>Key Laboratory of Photonics Materials and Technology in Universities of Shandong, Qingdao University, Qingdao 266071, P. R. China

<sup>f</sup>Shanghai Key Laboratory of Special Artificial Microstructure Materials and Technology, Tongji University, Shanghai 200092, P. R. China

\*Corresponding author. E-mail address: jc-zhang@qdu.edu.cn (J. C. Zhang); cn-xu@aist.go.jp (C. N. Xu)

### Table of Contents

**Table S1.** EML intensities of (Ba,Ca)TiO<sub>3</sub>:Pr<sup>3+</sup>,RE in comparison with that of (Ba,Ca)TiO<sub>3</sub>:Pr<sup>3+</sup> for the 1st and 2nd EML peaks

**Table S2.** The calculated trap depth and ThL intergral intensity (Peak 2) of (Ba,Ca)TiO<sub>3</sub>:Pr<sup>3+</sup>,RE

**Table 1.** EML intensities of (Ba,Ca)TiO<sub>3</sub>:Pr<sup>3+</sup>,RE in comparison with that of (Ba,Ca)TiO<sub>3</sub>:Pr<sup>3+</sup> for the 1st and 2nd EML peaks.

| <b>Co-doped</b> | <b>1st EML peak</b> | <b>1st EML peak int.</b> | <b>2nd EML peak</b> | <b>2nd EML peak int.</b> |
|-----------------|---------------------|--------------------------|---------------------|--------------------------|
| <b>RE ion</b>   | <b>int. (a.u.)</b>  | <b>RE/none ×100%</b>     | <b>int. (a.u.)</b>  | <b>RE/none ×100%</b>     |
| <b>none</b>     | 2436                | 100%                     | 874                 | 100%                     |
| <b>Y</b>        | 2939                | 120.6%                   | 979                 | 112.0%                   |
| <b>La</b>       | 3380                | 138.8%                   | 1494                | 170.9%                   |
| <b>Ce</b>       | 0                   | 0                        | 0                   | 0                        |
| <b>Nd</b>       | 3260                | 133.8%                   | 1195                | 136.7%                   |
| <b>Sm</b>       | 2075                | 85.2%                    | 758                 | 86.7%                    |
| <b>Eu</b>       | 1356                | 55.7%                    | 698                 | 79.9%                    |
| <b>Gd</b>       | 3923                | 161.0%                   | 1442                | 165.0%                   |
| <b>Tb</b>       | 2353                | 96.6%                    | 937                 | 107.2%                   |
| <b>Dy</b>       | 1412                | 58.0%                    | 510                 | 58.4%                    |
| <b>Ho</b>       | 2133                | 87.6%                    | 898                 | 102.7%                   |
| <b>Er</b>       | 1401                | 57.5%                    | 510                 | 58.4%                    |
| <b>Tm</b>       | 1646                | 67.6%                    | 645                 | 73.8%                    |
| <b>Yb</b>       | 2743                | 112.6%                   | 1087                | 124.4%                   |
| <b>Lu</b>       | 3090                | 126.8%                   | 1150                | 131.6%                   |

**Table 2.** The calculated trap depth and ThL intergral intensity (Peak 2) of (Ba,Ca)TiO<sub>3</sub>:Pr<sup>3+</sup>,RE

| Co-doped RE ion | <i>E</i> (eV) | ThL integral intensity<br>(a.u.) | ThL integral intensity<br>RE/none ×100% |
|-----------------|---------------|----------------------------------|-----------------------------------------|
| <b>none</b>     | 0.356         | 1382.5                           | 100%                                    |
| <b>Y</b>        | 0.377         | 1676.9                           | 121.3%                                  |
| <b>La</b>       | 0.313         | 2120.6                           | 153.4%                                  |
| <b>Ce</b>       | 0             | 0                                | 0                                       |
| <b>Nd</b>       | 0.330         | 1579.1                           | 114.2%                                  |
| <b>Sm</b>       | 0.309         | 1218.6                           | 88.1%                                   |
| <b>Eu</b>       | 0.330         | 1032.9                           | 74.7%                                   |
| <b>Gd</b>       | 0.351         | 2058.7                           | 148.9%                                  |
| <b>Tb</b>       | 0.369         | 1248.3                           | 90.3%                                   |
| <b>Dy</b>       | 0.376         | 800.8                            | 57.9%                                   |
| <b>Ho</b>       | 0.326         | 1210.9                           | 87.6%                                   |
| <b>Er</b>       | 0.352         | 904.6                            | 65.4%                                   |
| <b>Tm</b>       | 0.317         | 1114                             | 80.6%                                   |
| <b>Yb</b>       | 0.376         | 1654.3                           | 119.7%                                  |
| <b>Lu</b>       | 0.321         | 2001.9                           | 144.8%                                  |
